# Supplementary material
Source: PubMed Central journal article supplement (PMC2981497)
Supplement: supp_btq515_Supplementary_figure.pdf [file supp_btq515_Supplementary_figure.pdf]

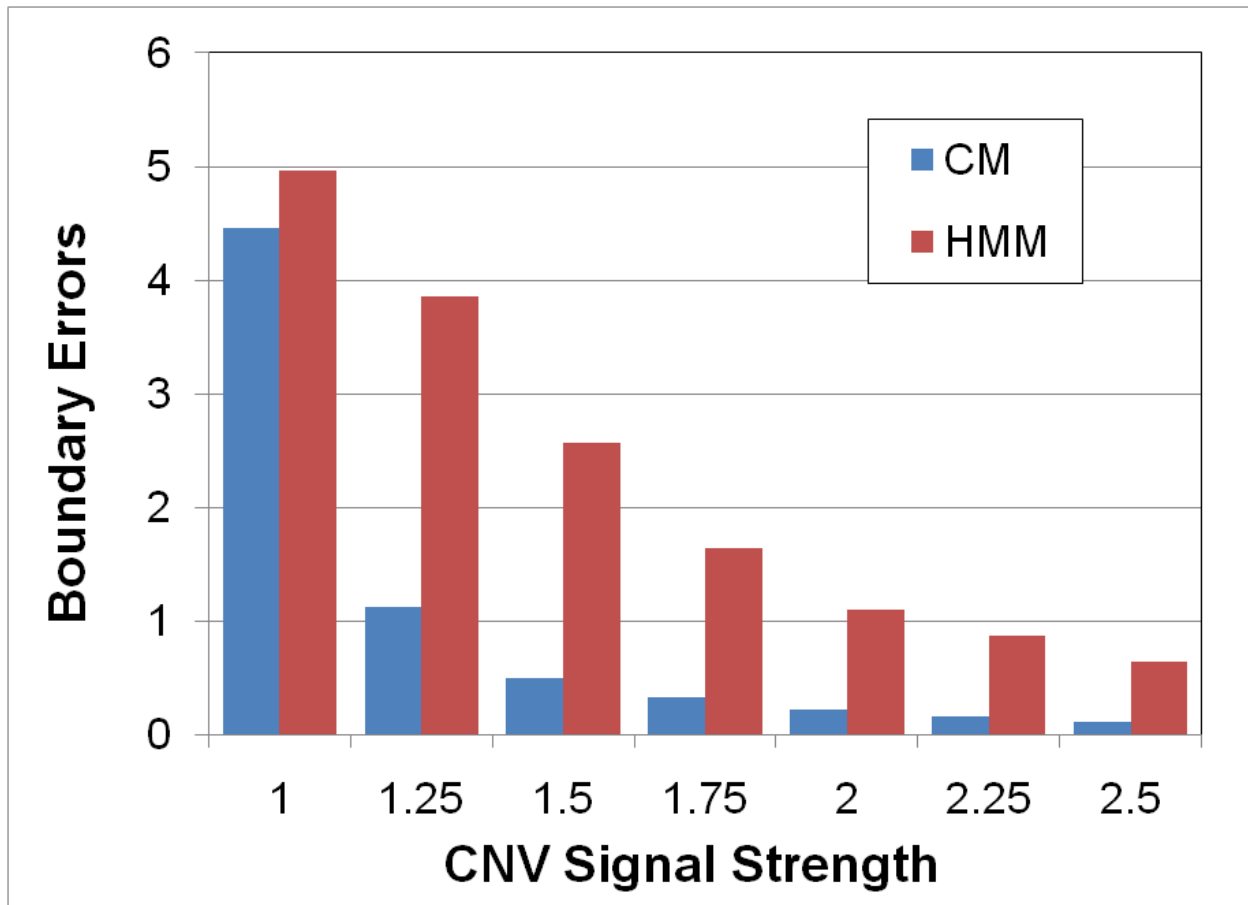

**Supplementary Figure 1:** Comparison of CopyMap and classical HMM algorithms. The horizontal axes shows the difference in signal strength  $\delta$  between the CNV- probes and probes with baseline copy number. We simulated a total of 100 CNVs. Each bar illustrates the average distance in probes between the start-and endpoints of correctly inferred CNV and the true CNV boundaries.
